# Supplementary material for: Soluble Klotho, a biomarker and therapeutic strategy to reduce bronchopulmonary dysplasia and pulmonary hypertension in preterm infants
Source: PubMed Central journal article supplement (PMC7378054; doi:10.1038/s41598-020-69296-1), 2020-07-23

**Soluble Klotho, a Biomarker and Therapeutic Strategy to Reduce Bronchopulmonary  
Dysplasia and Pulmonary Hypertension in Preterm Infants**

Sunil Batlahally<sup>1,2</sup>, Andrew Franklin<sup>5</sup>, Andreas Damianos<sup>1,2</sup>, Jian Huang<sup>1,2</sup>, Pingping Chen<sup>1,2</sup>, Mayank Sharma<sup>1,2</sup>, Joanne Duara<sup>1,2</sup>, Divya Keerthy<sup>1,2</sup>, Ronald Zambrano<sup>1,2</sup>, Lina Shehadeh<sup>3</sup>, Eliana C. Martinez<sup>3</sup>, Marissa J DeFreitas<sup>1</sup>, Shathiyah Kulandavelu<sup>1,3</sup>, Carolyn L Abitbol<sup>1</sup>, Michael J Freundlich<sup>1</sup>, Rosemeire M Kanashiro-Takeuchi<sup>1,3</sup>, Augusto Schmidt<sup>1,2</sup>, Merline Benny<sup>1,2</sup>, Shu Wu<sup>1,2</sup>, Karen K. Mestan<sup>5\*</sup> and Karen C. Young<sup>1,2,3\*</sup>

**Running Title:** Klotho, bronchopulmonary dysplasia and pulmonary hypertension

<sup>1</sup>Department of Pediatrics, University of Miami Miller School of Medicine, Miami, FL

<sup>2</sup>Batchelor Children's Research Institute, University of Miami Miller School of Medicine, Miami, FL

<sup>3</sup>The Interdisciplinary Stem Cell Institute, University of Miami Miller School of Medicine, Miami, FL

<sup>4</sup>Department of Molecular and Cellular Pharmacology, University of Miami Miller School of Medicine, Miami, FL

<sup>5</sup>Ann & Robert H. Lurie Children's Hospital of Chicago, Northwestern University Feinberg School of Medicine, Chicago, IL

\*Karen K. Mestan and Karen C. Young are co-senior authors.

**Figure 1a**

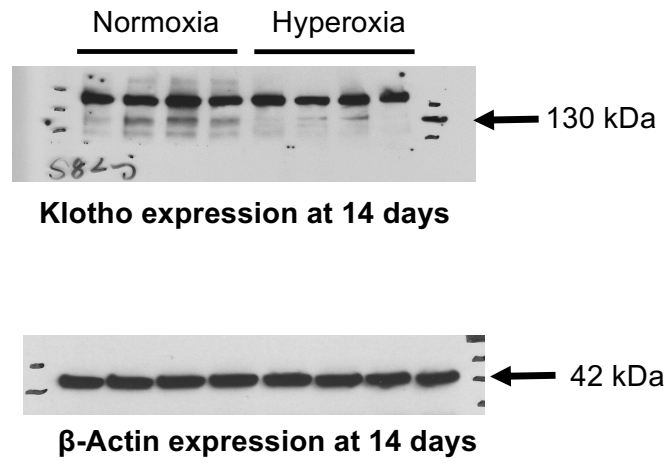

**Figure 1b**

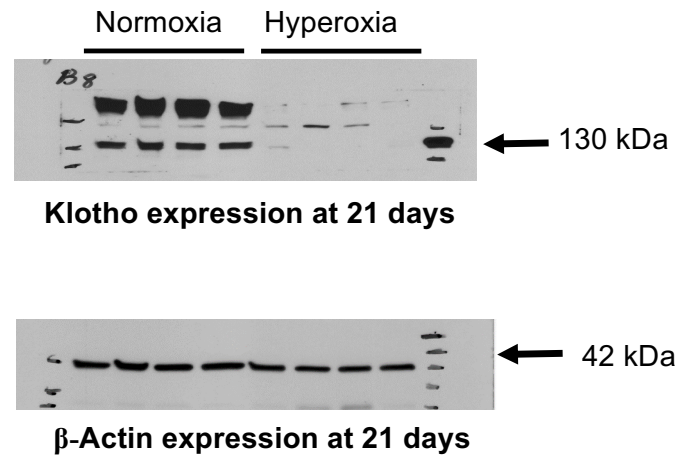

**Figure 2a**

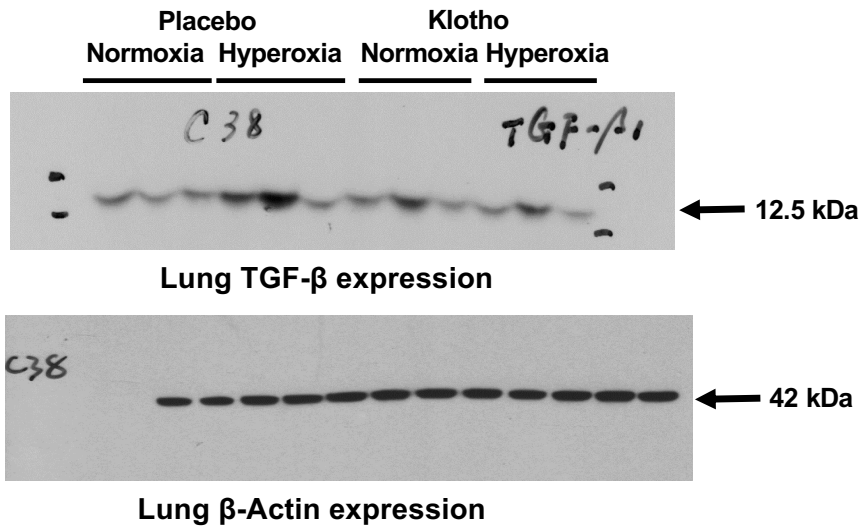

**Figure 2b**

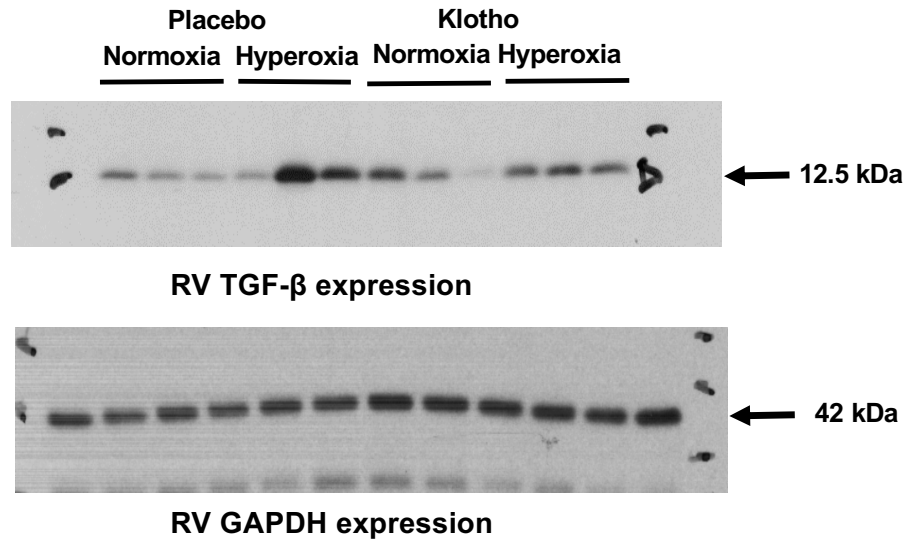

**Figure 3a**

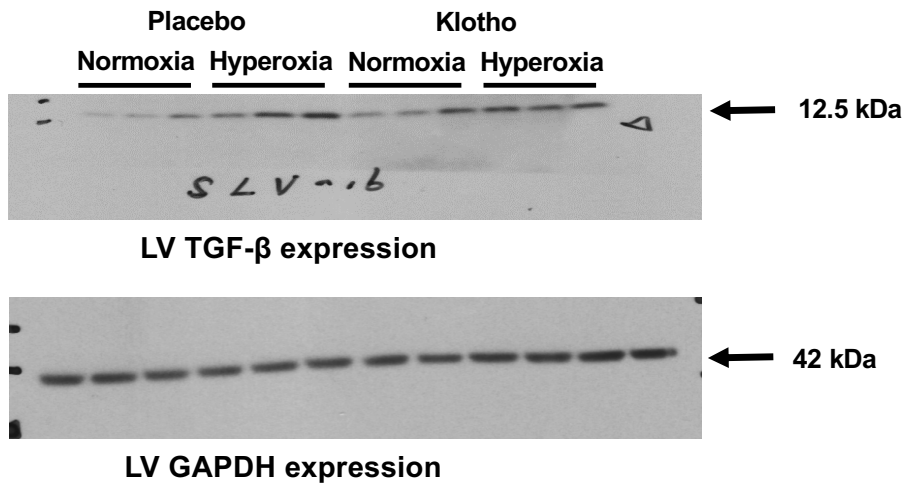

**Figure 3b**

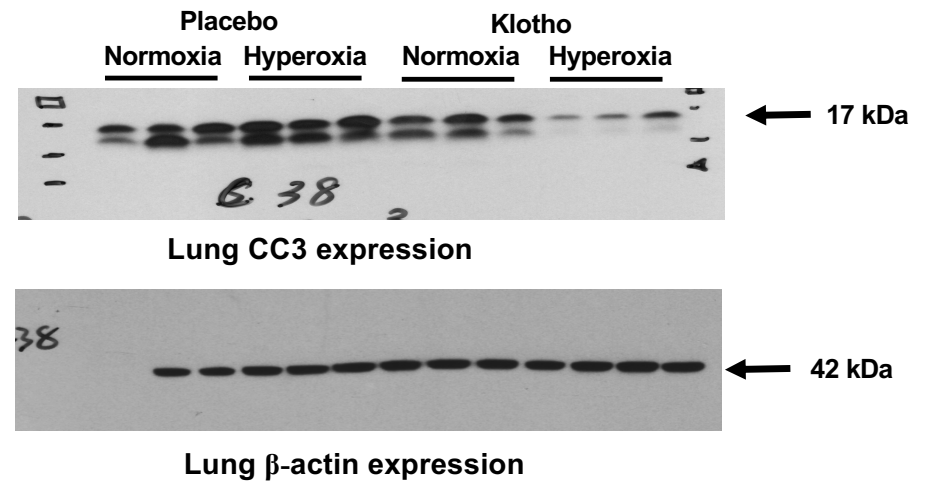

Figure 4a

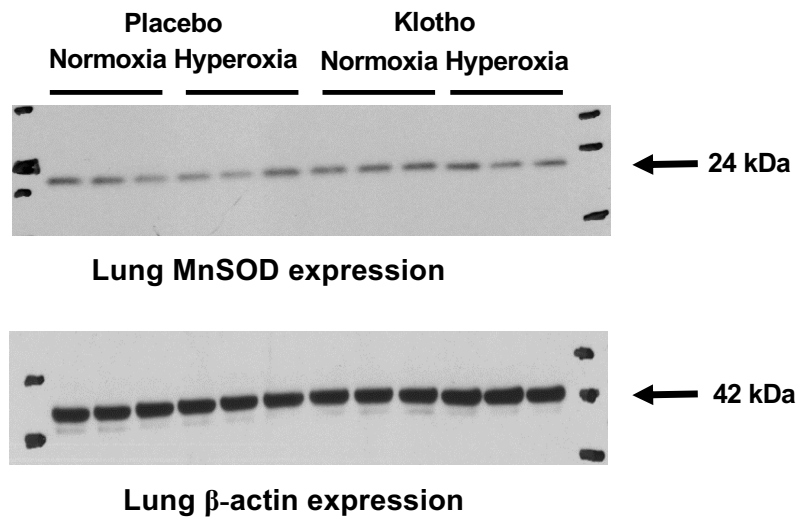

Figure 4b

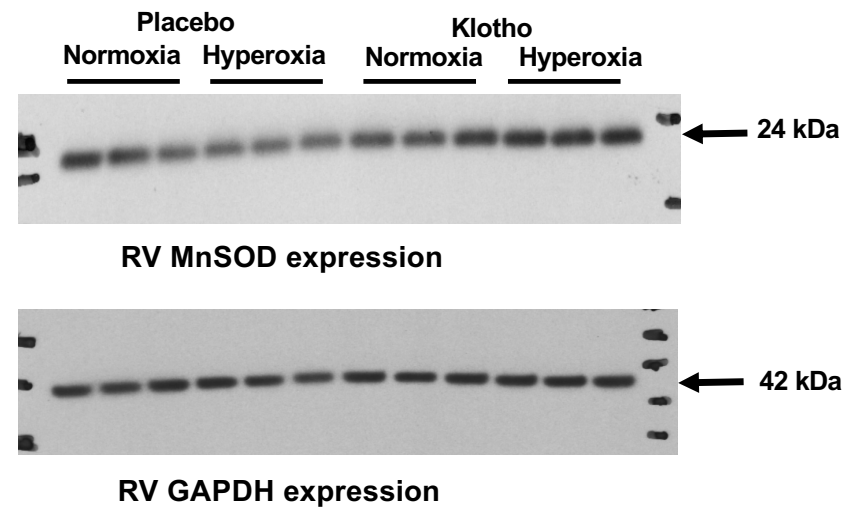

Supplement: 41598_2020_69296_MOESM1_ESM.pdf [file 41598_2020_69296_MOESM1_ESM.pdf]
